# Supplementary material for: Stable, highly conductive and orthogonal silver nanowire networks via zwitterionic treatment
Source: Royal Society of Chemistry journal article supplement (doi:10.1039/d2ta07406k), 2022-11-29
Supplement: d2ta07406k1.pdf [file d2ta07406k1.pdf]

## Supporting Information

### **Stable, high-conductive and orthogonal silver nanowire networks via zwitterionic treatment**

By Hui Li, Qiaomei Chen,\* Guangcong Zhang, Zhou Zhang, Jie Fang, Chaowei Zhao, and Weiwei

Li\*

## Contents

1. Zeta potentials
2. Surface potentials
3. Investigation of treatment conditions
4. TEM images
5. SEM characterizations
6. Performance of the FTE
7. Photovoltaic parameters and EQE spectrum of the FOSC

## 1. Zeta potentials

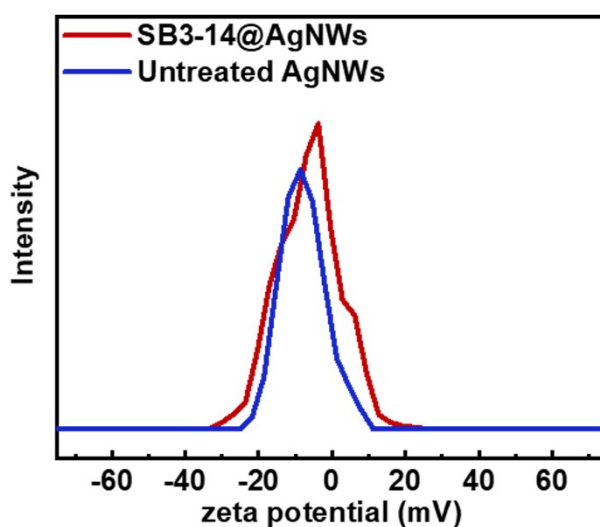

**Figure S1.** Zeta potentials for SB3-14@AgNWs and untreated AgNWs in solution.

## 2. Surface potentials

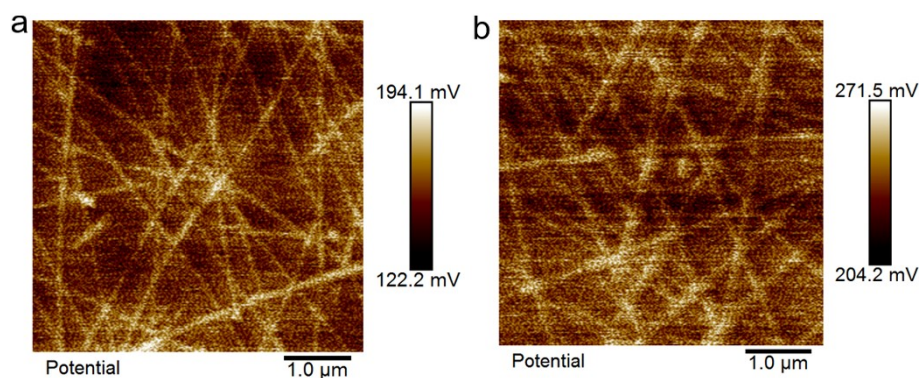

**Figure S2.** 2D mapping of the surface potentials of the untreated AgNWs (a) and SB3-14@AgNWs (b) surface (1 μm×1 μm) via KPFM.

## 3. Investigation of treatment conditions

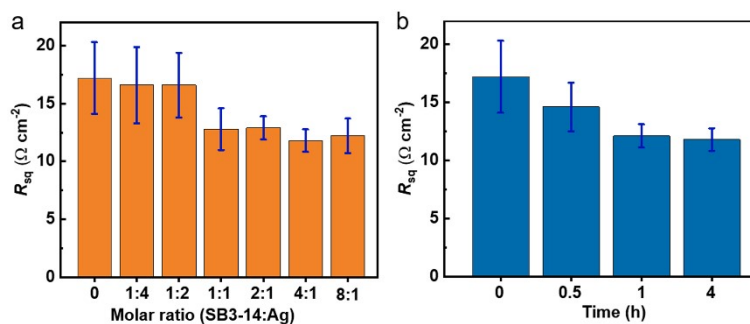

**Figure S3.** The effect of the molar ratio of SB3-14:Ag (a) and treatment time (b) on the sheet resistance ( $R_{sh}$ ) of the SB3-14@AgNWs electrode, where the treatment time (4 h) and molar ratio (4:1) were two constants, respectively.

## 4. TEM images

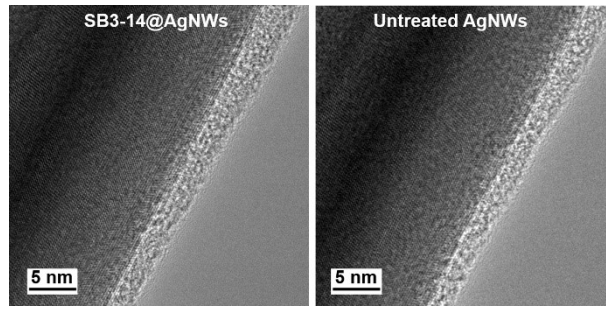

Figure S4. TEM images for the single SB3-14@AgNWs and untreated AgNWs.

### 5. SEM characterizations

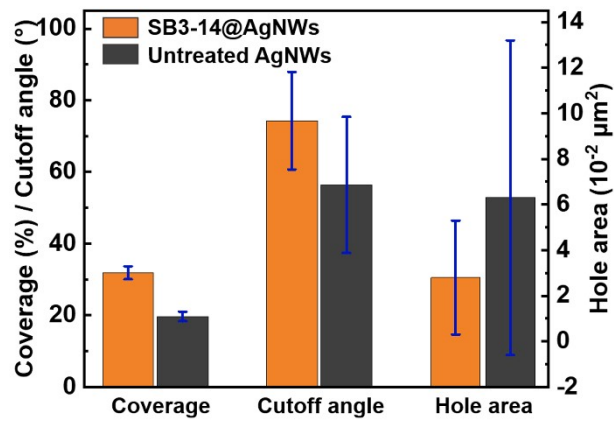

Figure S5. Statistical analysis results obtained from the SEM images.

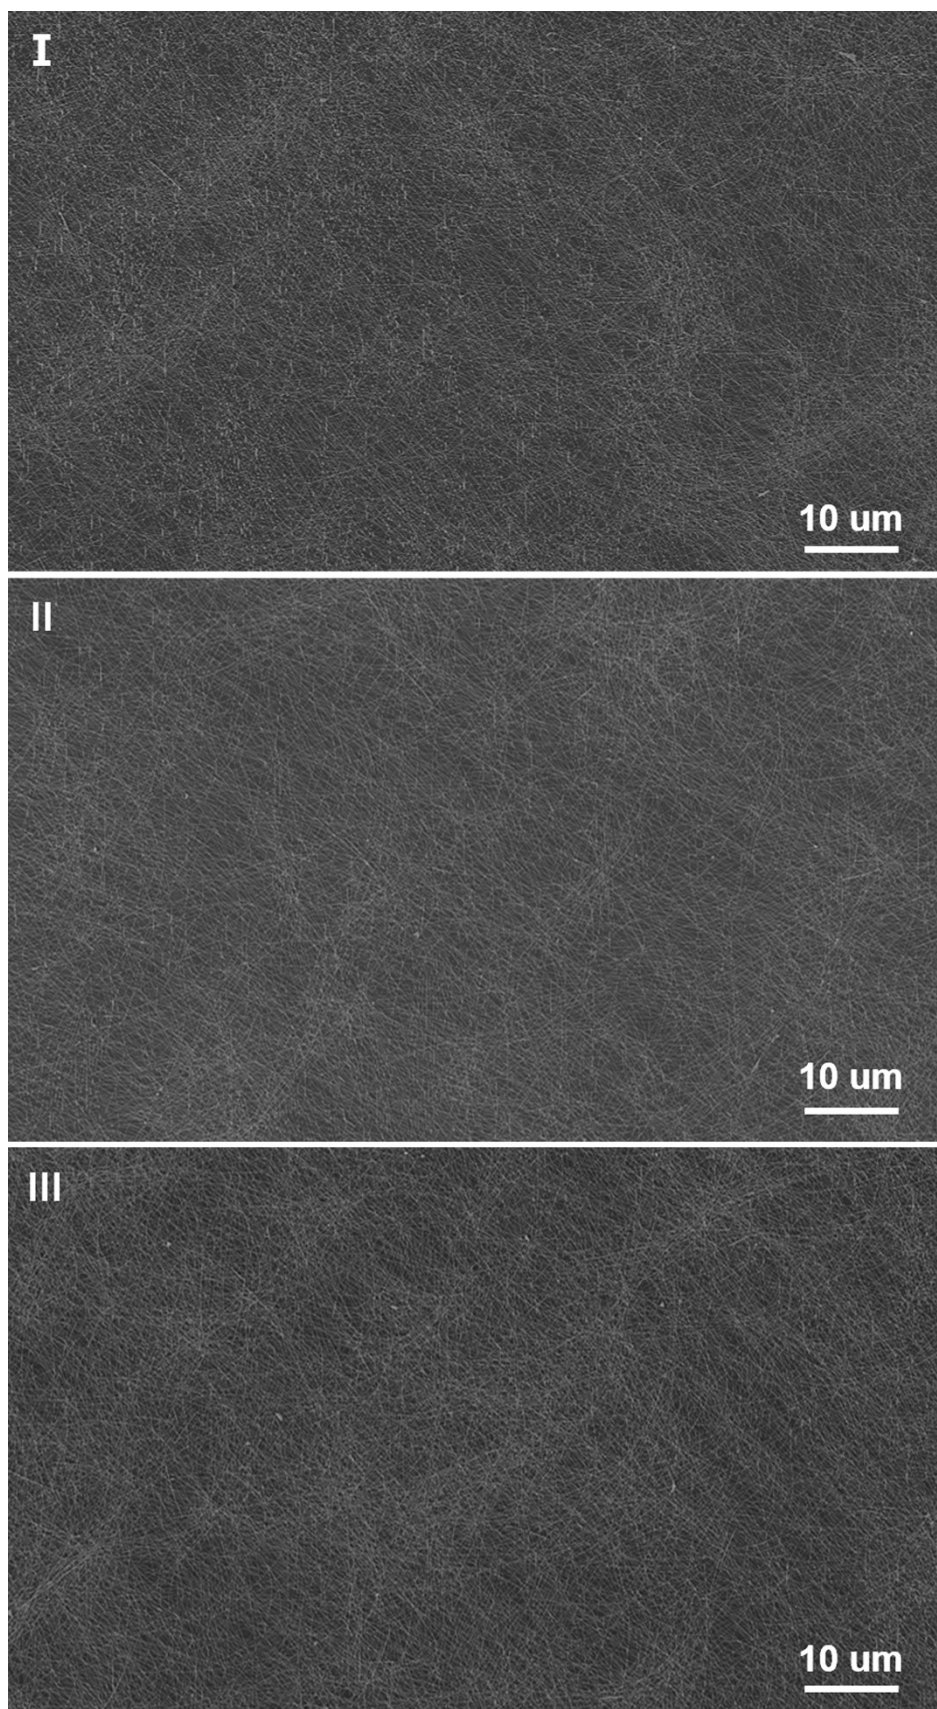

**Figure S6.** SEM images of the SB3-14@AgNWs electrode with characterization area of  $100 \times 60 \mu\text{m}^2$ , where images I, II and III refer to three different positions of the same electrode.

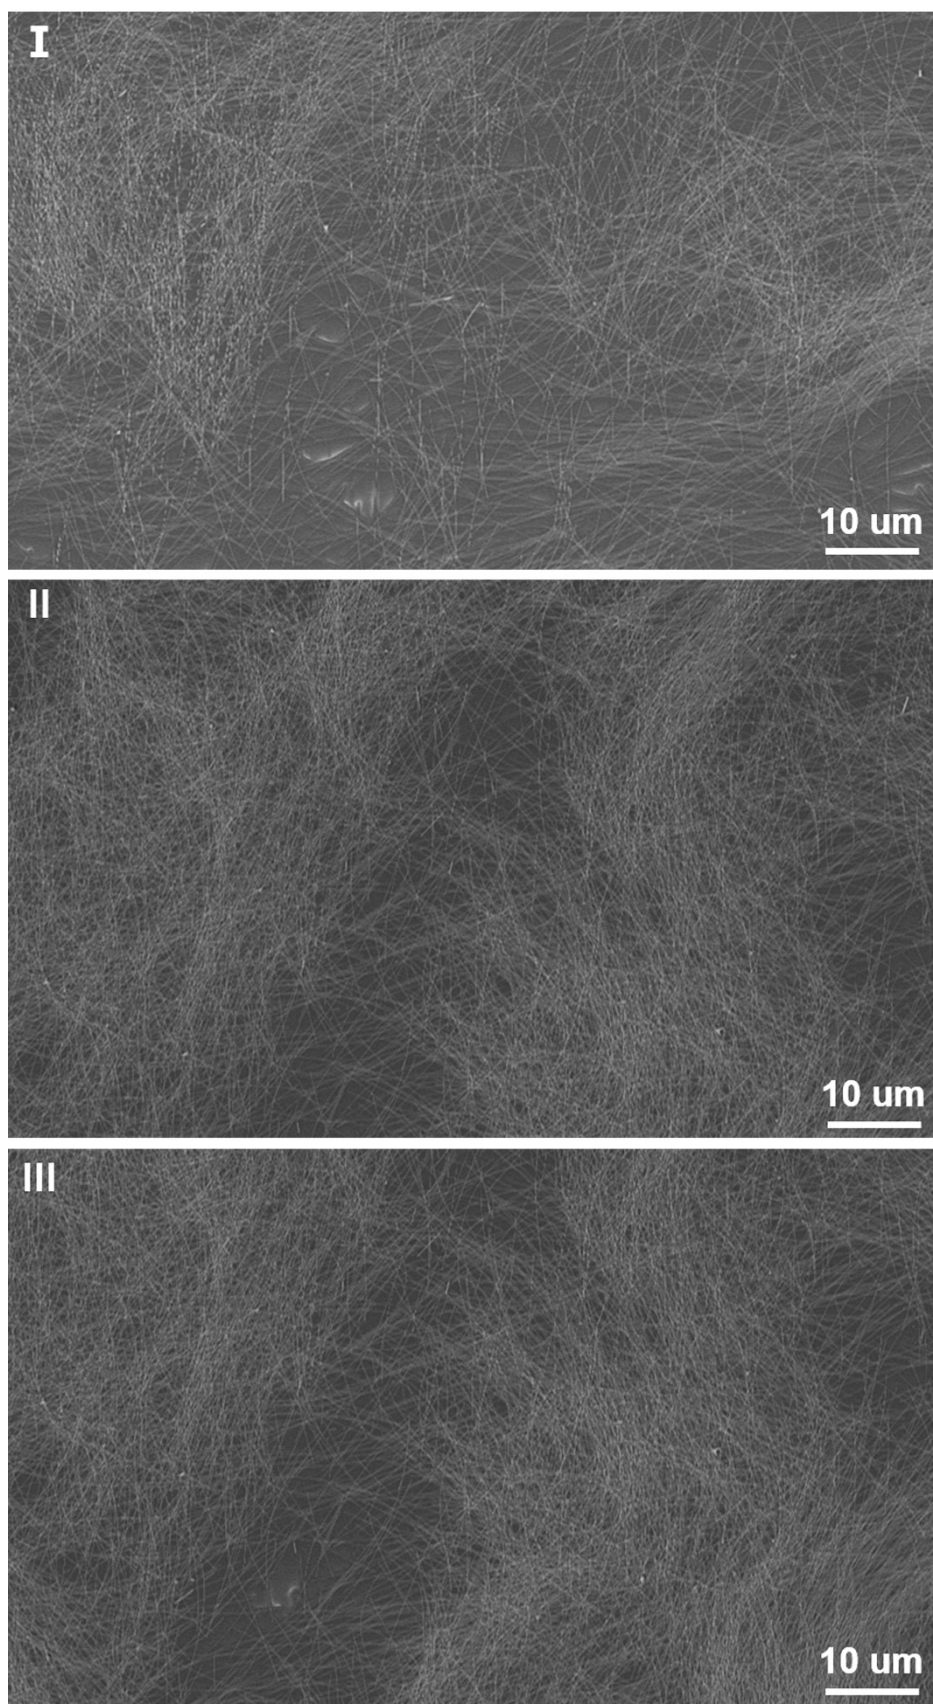

**Figure S7.** SEM images of the untreated AgNWs electrode with characterization area of  $100 \times 60 \mu\text{m}^2$ , where images I, II and III refer to three different positions of the same electrode.

## 6. Performance of the FTE

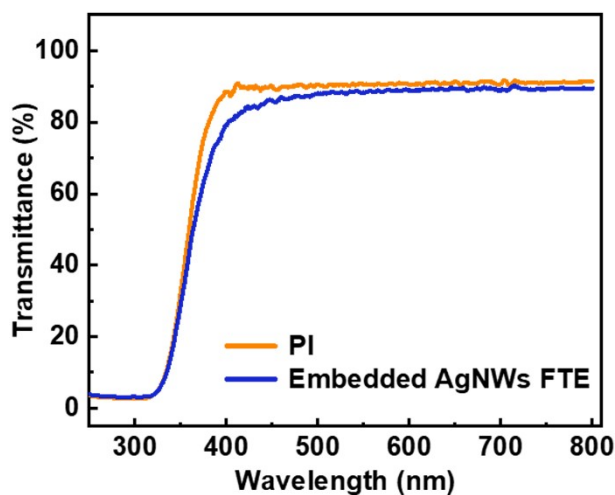

**Figure S8.** Optical transmittance curves of the Em-AgNWs FTE and PI film.

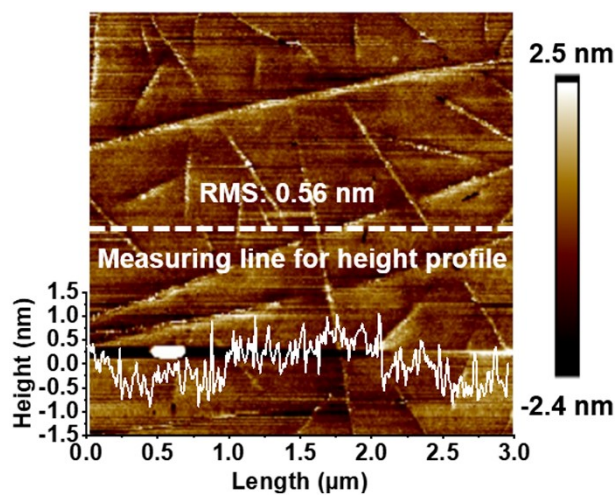

**Figure S9.** The planar AFM image of the Em-AgNWs FTE and height values obtained from the dashed line in the planar AFM image.

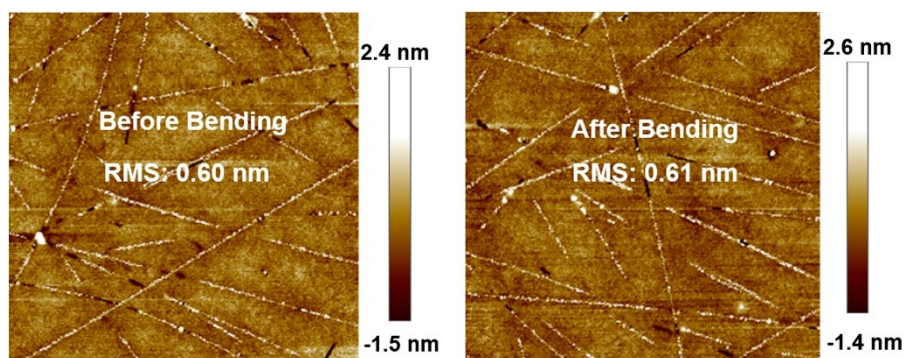

**Figure S10.** The planar AFM images of the Em-AgNWs FTE before and after bending at a radius of 0 mm for 1000 cycles.

## 7. Photovoltaic parameters and EQE spectrum of the FOSC

**Table S1. Photovoltaic parameters of the flexible and rigid OSCs.**

| Electrode       | $V_{oc}$<br>[V]          | $J_{sc}$<br>[mA cm <sup>-2</sup> ] | $J_{EQE}^{[a]}$<br>[mA cm <sup>-2</sup> ] | FF<br>[%]             | PCE <sup>[b]</sup><br>[%] |
|-----------------|--------------------------|------------------------------------|-------------------------------------------|-----------------------|---------------------------|
| Em-AgNWs<br>FTE | 0.834<br>(0.854 ± 0.013) | 24.26<br>(23.67 ± 0.40)            | 23.23                                     | 76.34<br>(75.25±0.91) | 15.41<br>(15.21 ± 0.09)   |
| ITO/glass       | 0.879<br>(0.880 ± 0.002) | 25.34<br>(25.00 ± 0.06)            | 24.17                                     | 74.43<br>(75.00±0.59) | 16.58<br>(16.50 ± 0.21)   |

<sup>[a]</sup>  $J_{EQE}$  was calculated from the EQE integration. <sup>[b]</sup> Average PCEs with standard deviations were calculated from 6 individual devices.

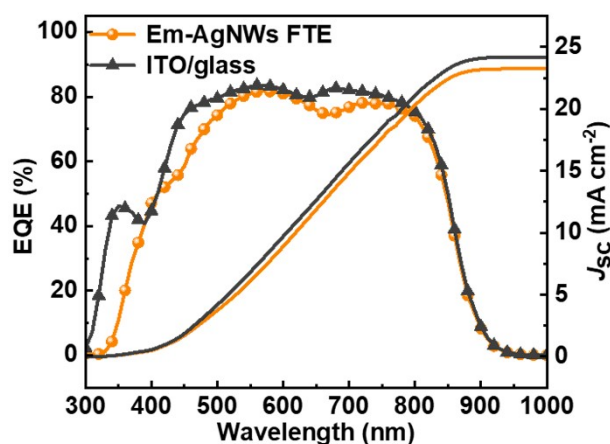

**Figure S11.** EQE spectrum of the flexible and rigid OSCs.

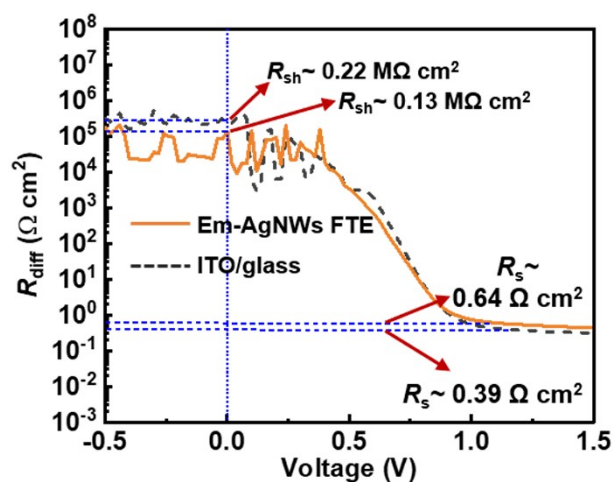

**Figure S12.** Differential resistance ( $R_{diff}$ ) of the flexible and rigid OSCs in the dark vs applied bias.
